# Supplementary material for: Chromosomal instability of circulating tumor DNA reflect therapeutic responses in advanced gastric cancer
Source: PubMed Central journal article supplement (PMC6754425; doi:10.1038/s41419-019-1907-4), 2019-09-20
Supplement: 41419_2019_1907_MOESM6_ESM.pdf [file 41419_2019_1907_MOESM6_ESM.pdf]

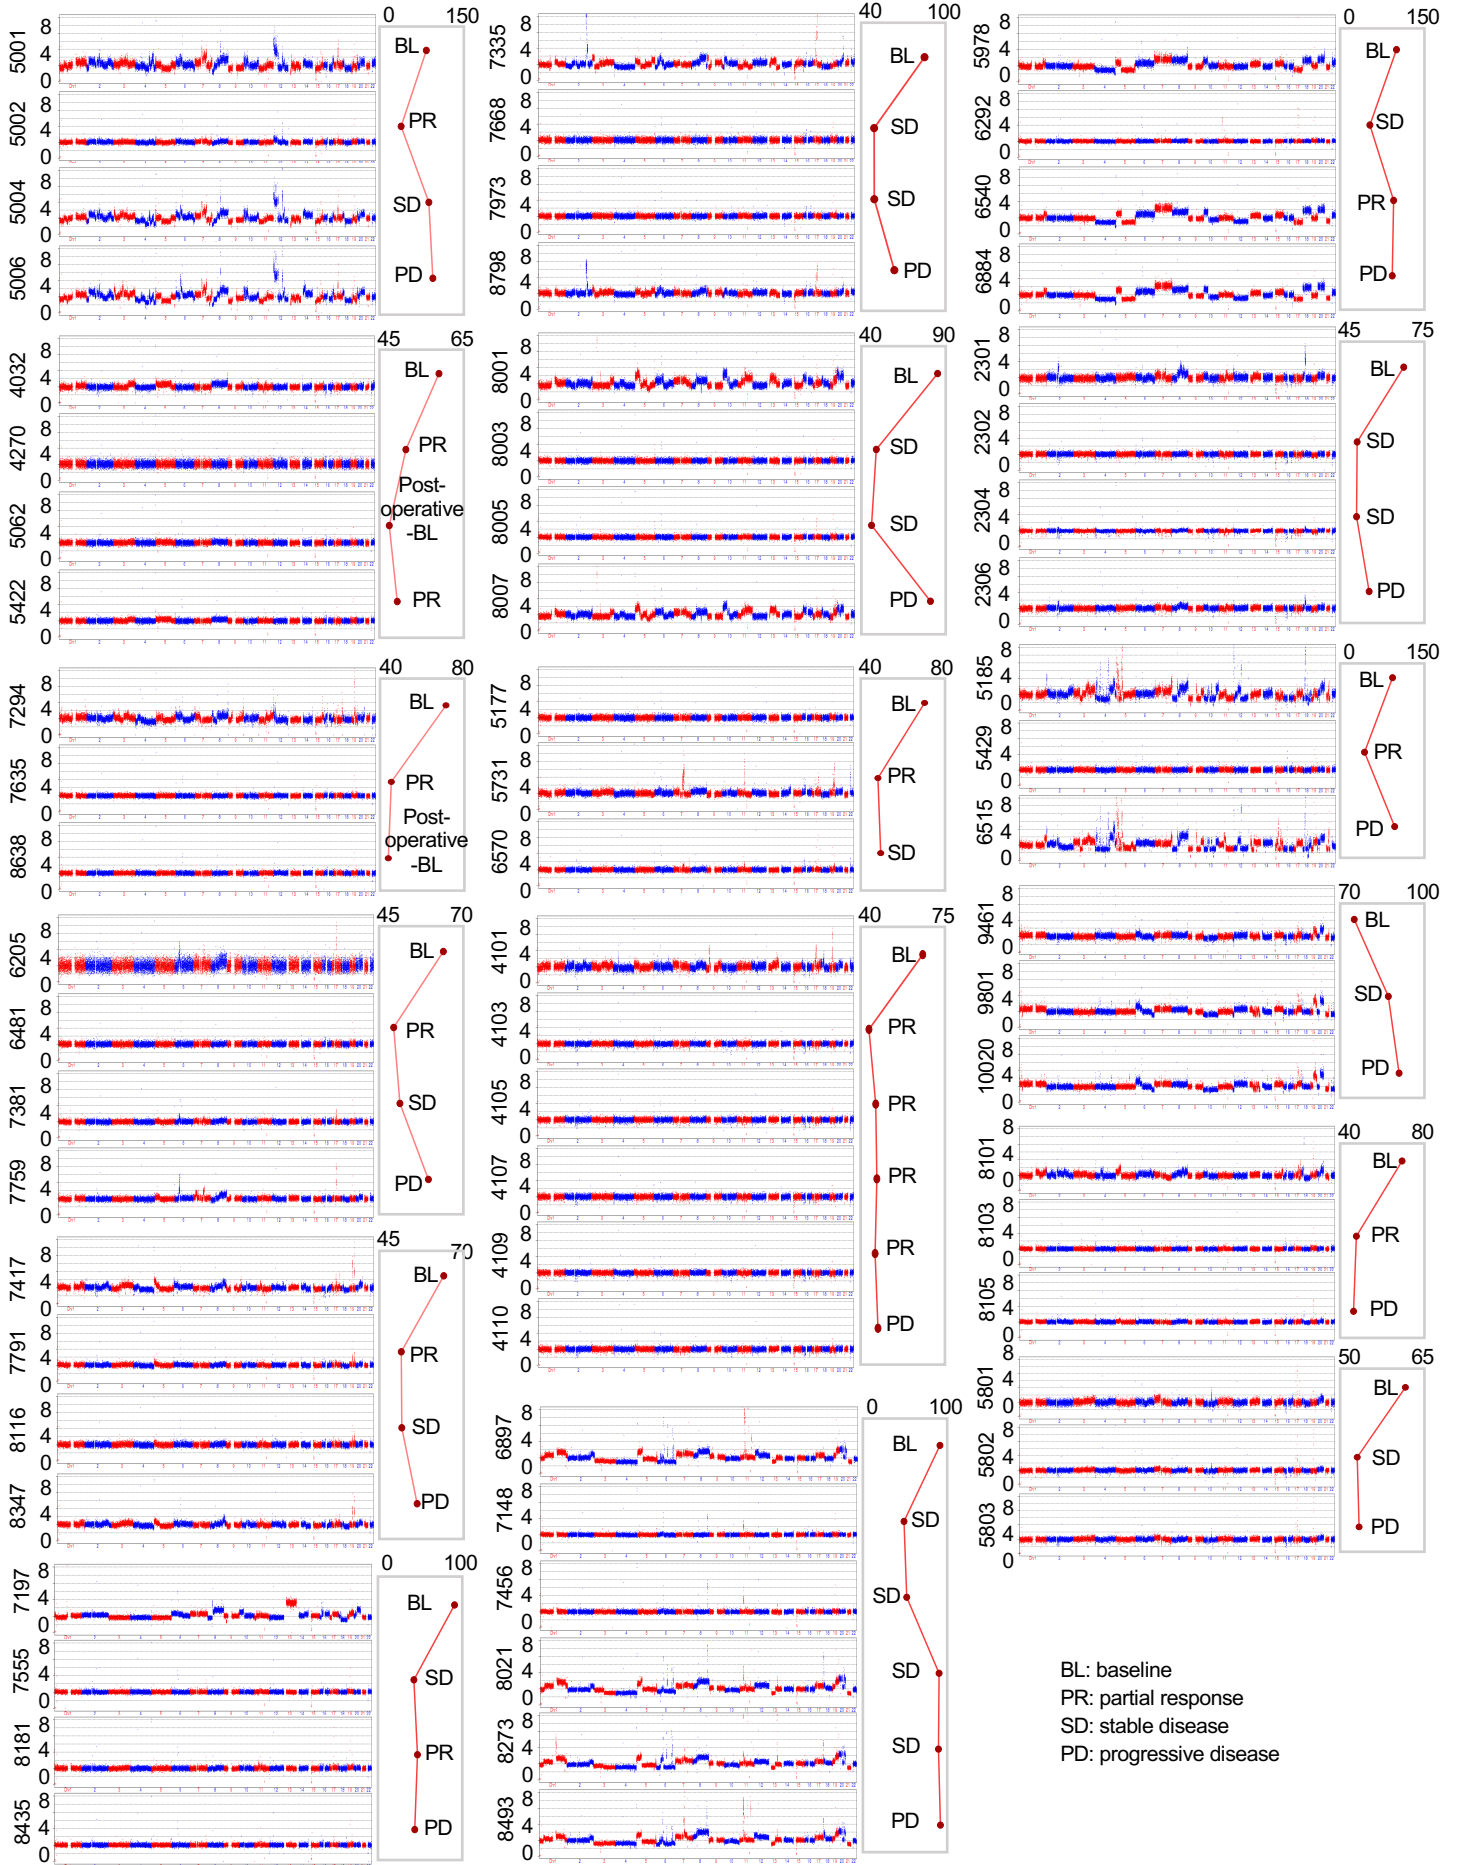

5001  
5002  
5004  
5006  
4032  
4270  
5062  
5422  
7294  
7635  
8638  
6205  
6481  
7381  
7759  
7417  
7791  
8116  
8347  
7197  
7555  
8181  
8435

0 150  
45 65  
40 80  
45 70  
45 70  
0 100

7335  
7668  
7973  
8798  
8001  
8003  
8005  
8007  
5177  
5731  
6570  
4101  
4103  
4105  
4107  
4109  
4110  
6897  
7148  
7456  
8021  
8273  
8493

40 100  
40 90  
40 80  
40 80  
40 75  
0 100

5978  
6292  
6540  
6884  
2301  
2302  
2304  
2306  
5185  
5429  
6515  
9461  
9801  
10020  
8101  
8103  
8105  
5801  
5802  
5803

0 150  
45 75  
0 150  
70 100  
40 80  
50 65
