# Supplementary material for: Chromosomal instability of circulating tumor DNA reflect therapeutic responses in advanced gastric cancer
Source: PubMed Central journal article supplement (PMC6754425; doi:10.1038/s41419-019-1907-4), 2019-09-20

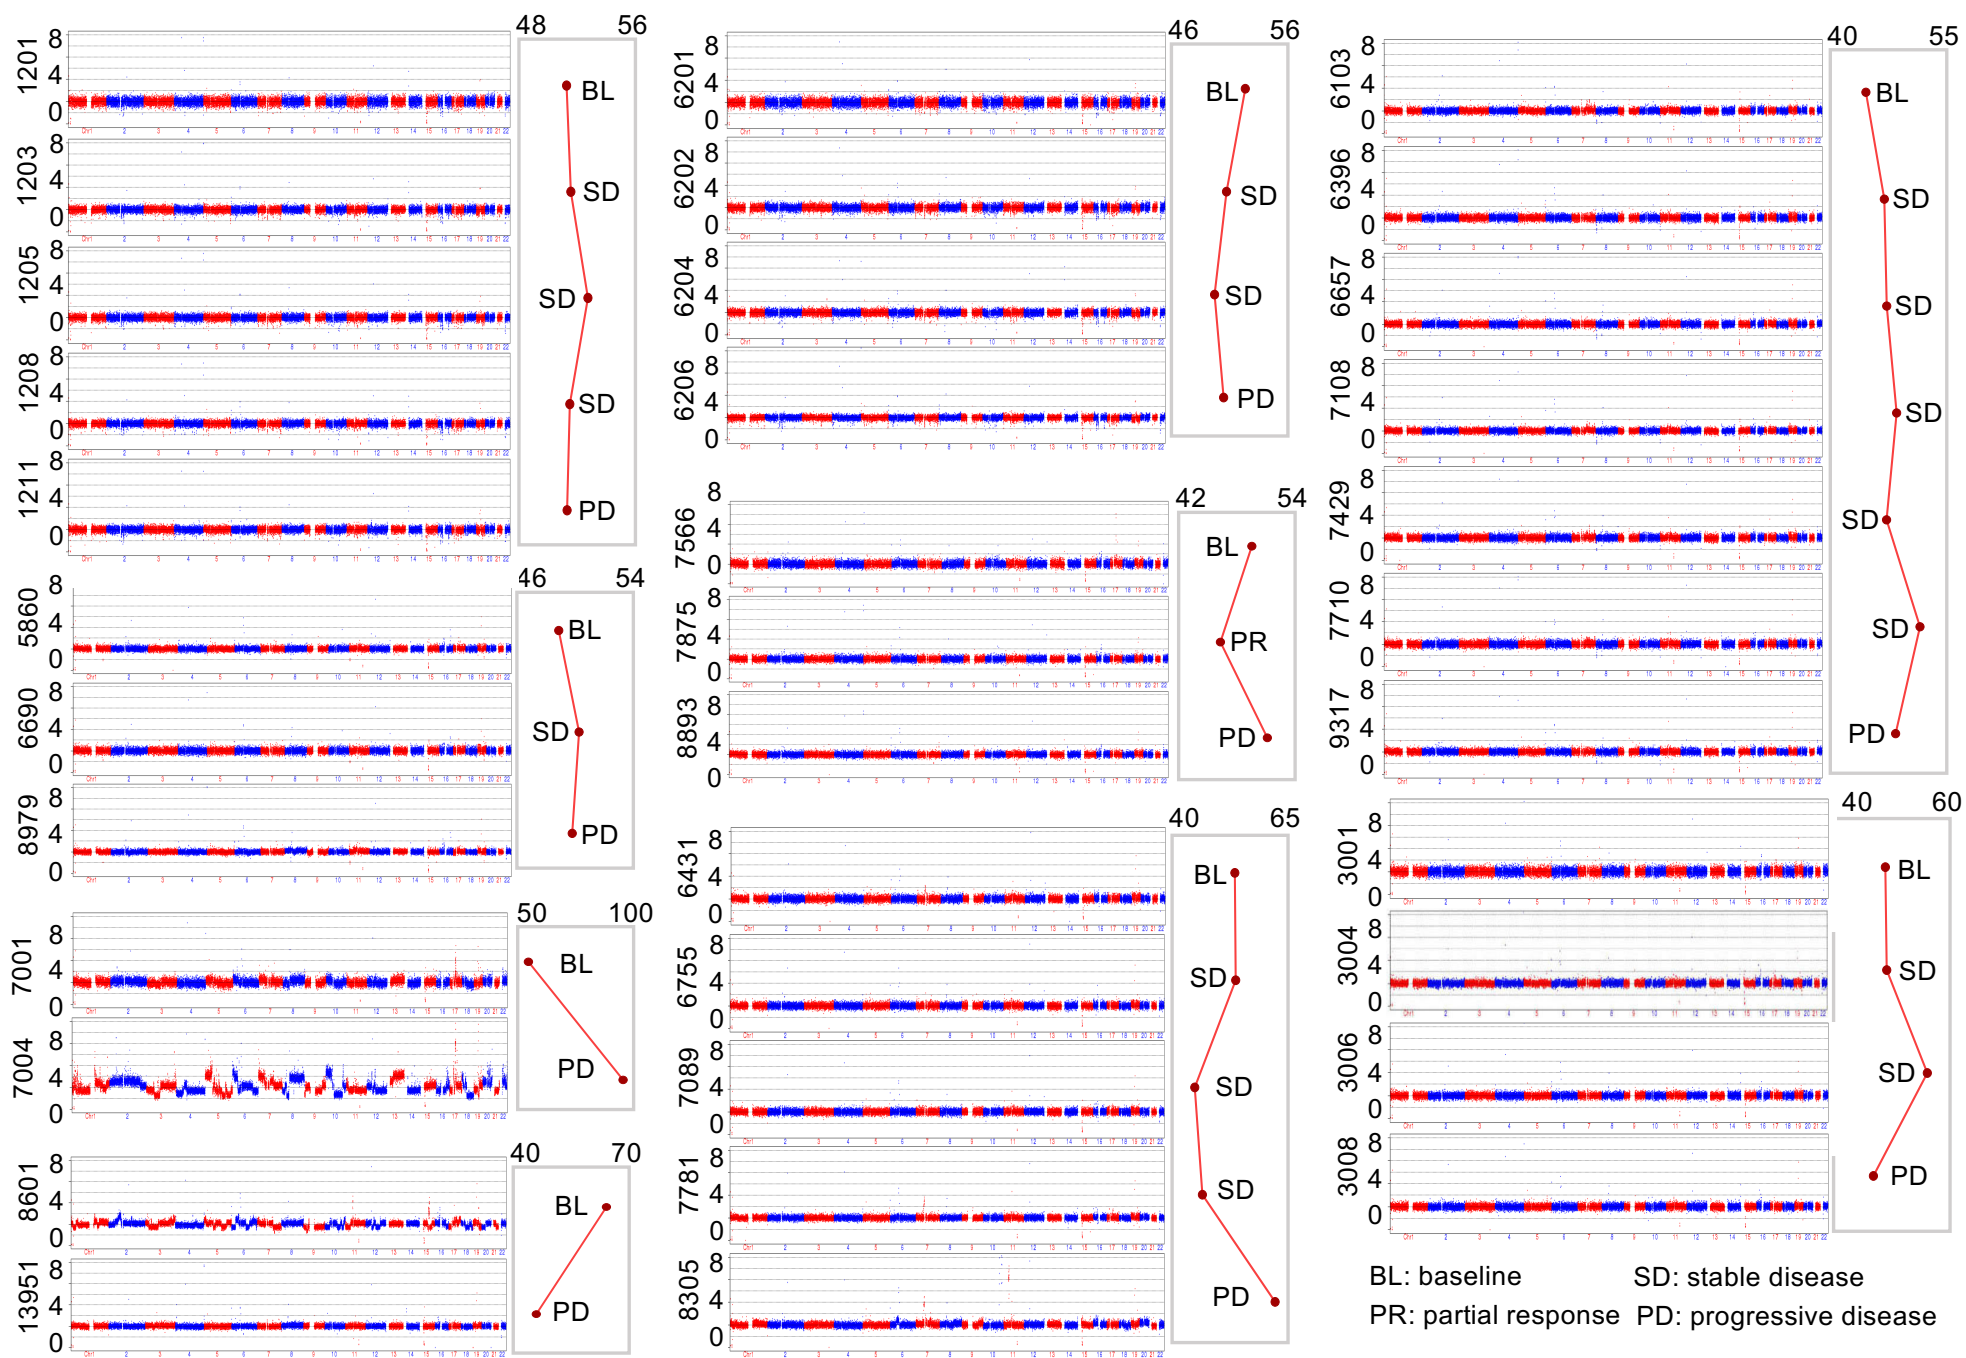

Supplement: 41419_2019_1907_MOESM7_ESM.pdf [file 41419_2019_1907_MOESM7_ESM.pdf]
